# 1 Relationships between macro-fungal dark diversity and 2 habitat parameters using LiDAR

3 Jose W. Valdez<sup>1</sup>, Ane Kirstine Brunbjerg<sup>1</sup>, Camilla Fløjgaard<sup>1</sup>, Lars Dalby<sup>1</sup>, Kevin K.  
4 Clausen<sup>1</sup>, Meelis Pärtel<sup>2</sup>, Norbert Pfeifer<sup>3</sup>, Markus Hollaus<sup>3</sup>, Michael H. Wimmer<sup>3</sup>, Rasmus  
5 Ejrnæs<sup>1</sup>, Jesper Erenskjold Moeslund<sup>1\*</sup>

6 <sup>1</sup>Department of Bioscience, Aarhus University, Grenåvej 14, 8410, Rønde, Denmark

7 <sup>2</sup>Department of Botany, Institute of Ecology and Earth Sciences, University of Tartu, Lai 40,  
8 Tartu, 51005, Estonia

9 <sup>3</sup>Department of Geodesy and Geoinformation, Technische Universität Wien, Wiedner  
10 Hauptstraße 8/E120, 1040 Vienna, Austria

11 \*Corresponding author. Email: [jesper.moeslund@bios.au.dk](mailto:jesper.moeslund@bios.au.dk)

## 12 Abstract

13 Despite the important role of fungi for ecosystems, relatively little is known about the factors  
14 underlying the dynamics of their diversity. Moreover, studies do not typically consider their  
15 dark diversity: the species absent from an otherwise suitable site. Here, we examined  
16 potential drivers of local fungal dark diversity in temperate woodland and open habitats using  
17 LiDAR and in-situ field measurements, combined with a systematically collected and  
18 geographically comprehensive macro-fungi and plant data set. For the first time, we also  
19 estimated species pools of fungi by considering both plant and fungi co-occurrences. The  
20 most important LiDAR variables for modelling fungal dark diversity were amplitude and  
21 echo ratio, which are both thought to represent vegetation structure. These results suggest that  
22 the local fungal dark diversity is highest in production forests like plantations and lowest in  
23 more open forests and in open habitats with little woody vegetation. Plant species richness  
24 was the strongest explanatory factor overall and negatively correlated with local fungal dark  
25 diversity. Soil fertility showed a positive relationship with dark diversity in open habitats.  
26 These findings may indicate that the local dark diversity of macro-fungi is highest in areas  
27 with a relatively high human impact (typically areas with low plant species richness and high  
28 soil fertility). Overall, this study brings novel insights into local macro-fungi dark diversity  
29 patterns, suggesting that a multitude of drivers related to both soil and vegetation act in  
30 concert to determine fungal dark diversity.

31 **Key Words:** airborne laser scanning, bog, fens, forests, fungal diversity, grasslands,  
32 mycorrhiza, regional species pool, remote sensing, shrublands, wetlands

### 33 **Introduction**

34 Understanding the underlying drivers shaping biodiversity patterns is a central goal in  
35 ecology and conservation biology. This is also true for fungi which play a vital role in  
36 ecosystem functioning as decomposers, mutualists, and pathogens. However, fungi and the  
37 underlying environmental factors influencing fungal diversity is less studied than animals and  
38 plants, and quantifying fungal diversity is far from trivial. The most commonly used  
39 biodiversity metric is observed species richness (Mueller 2011). However, this measure is not  
40 always suitable for comparisons across habitats and conveys no information on the part of the  
41 diversity that is potentially missing in a given site (Pärtel *et al.* 2011). In addition, monitoring  
42 fungal diversity is often severely hampered by detectability issues and the life history of the  
43 involved species (Yahr *et al.* 2016, Blackwell and Vega 2018). Several alternative  
44 approaches have been developed to more effectively monitor and compare biodiversity across  
45 landscapes (Solow and Polasky 1994, Sarkar and Margules 2002, Ricotta 2005, Ricotta  
46 2007). Although these methods can provide valuable insights, they do not consider the dark  
47 diversity, the absent part of the species pool which can potentially inhabit an environmentally  
48 suitable site (Pärtel *et al.* 2011). This often-ignored aspect of diversity provides a novel and  
49 ecologically meaningful metric for estimating how much of the potential species diversity –  
50 the site-specific species pool – is lacking (Pärtel *et al.* 2011). This information is important to  
51 understand the underlying mechanisms and dynamics of community assembly (e.g.,  
52 community saturation) (Mateo *et al.* 2017). Dark diversity may also become an important  
53 conservation tool to measure biodiversity potential, such as aiding managers or policy-makers  
54 to prioritize certain habitats, estimate restoration potential of degraded habitats, or forecast  
55 potential impacts of invasions (Lewis *et al.* 2017). Here, we use fungal data from 130  
56 thoroughly inventoried sites covering all terrestrial habitats, from open to forest, and wet to  
57 arid, to investigate important drivers of fungal dark diversity.

58 Dark diversity aims to reconcile the role of simultaneous, and potentially  
59 confounding, regional and local processes underlying biodiversity patterns and biological  
60 communities (Pärtel *et al.* 2011, Pärtel 2014). In any given landscape, the biodiversity  
61 potential is ultimately determined by large-scale biogeographic and evolutionary processes  
62 (i.e., species diversification and historic migration patterns) determining the set of species

63 which can theoretically inhabit a site, defined as the regional pool (Pärtel *et al.* 1996, Cornell  
64 and Harrison 2014, Zobel 2016). This regional pool is further filtered by local processes such  
65 as environmental gradients, species interactions, population dynamics, dispersal, disturbance,  
66 and stochastic events and referred to as the site-specific species pool, i.e., species that could  
67 possibly live in a given site (Pärtel *et al.* 2013, Cornell and Harrison 2014, Ronk *et al.* 2015,  
68 Zobel 2016). While many studies have investigated the drivers of fungal diversity, only a few  
69 studies have focused on the determinants of fungal dark diversity. These studies demonstrate  
70 that higher temperatures increases arbuscular mycorrhizal dark diversity (Pärtel *et al.* 2017a)  
71 and annual precipitation decreases the dark diversity of ectomycorrhizal fungi at the global  
72 scale (Pärtel *et al.* 2017b). These results concur with previous research suggesting that large  
73 scale climatic factors are strong drivers of fungal richness and community composition,  
74 attributed to the direct and indirect effects which alter soil and floristic conditions (Staddon *et*  
75 *al.* 2003, Kivlin *et al.* 2011, Tedersoo *et al.* 2014). Local edaphic conditions such as soil  
76 moisture, pH, and calcium concentration are also known to influence fungal diversity (Geml  
77 *et al.* 2014, Tedersoo *et al.* 2014, Tonn and Ibáñez 2017, Frøslev *et al.* 2019), but it is not  
78 known how these environmental factors affect fungal dark diversity. In fact, the general  
79 mechanisms determining dark diversity in fungal communities remain largely unknown.  
80 Clearly, species can be absent from an area just by chance (Hubbell 2011). Species can also  
81 be absent from a site because of some kind of unexpected disturbance – for example human,  
82 but it could also be natural – altering species’ dispersal, establishment, or persistence  
83 possibilities. In principle, these disturbances can be both biological and chemical and act at  
84 various spatial scales. An example could be extreme drought. Often habitats have a constant  
85 level of relatively low or usual disturbances that the habitat’s species are adapted to (e.g.,  
86 grazing), and these do not count towards disturbances that can cause dark diversity. It is  
87 important not to confuse dark diversity with hidden diversity; i.e., species that are actually  
88 present in a given site but just not recorded (Milberg *et al.* 2008, Abrego *et al.* 2016).

89 Besides the influence of environmental gradients, other factors particularly important  
90 for fungi are vegetation and habitat structure, such as vegetation height, shrub layer,  
91 vegetation cover, dead wood, and other woody features (Humphrey *et al.* 2000, Nordén and  
92 Paltto 2001, Nordén *et al.* 2004, Gómez-Hernández and Williams-Linera 2011, Zuo *et al.*  
93 2016). As the dominant primary producer in terrestrial ecosystems, plants also form the living  
94 and dead organic carbon pools and biotic surfaces that are the niche space for not only fungi  
95 but other taxonomic groups as well (DeAngelis 2012, Brunbjerg *et al.* 2017). These structural

96 elements are an important element for biodiversity, and can influence not only fungal  
97 diversity, but the diversity of plants, animals, and bacteria as well (Penone *et al.* 2019).  
98 However, despite the obvious contribution of these variables, such factors are rarely covered  
99 extensively since they are difficult to measure and require large amounts of resources to  
100 obtain sufficient and high quality data. However, emerging technologies such as LiDAR  
101 (light detection and ranging) could potentially remedy this situation.

102 Airborne LiDAR records a three-dimensional set of points using laser ranging from an  
103 aircraft or a drone (Lefsky *et al.* 2002). It captures data suitable to represent many of the  
104 vegetation and landscape structural measures important to fungi (Vehmas *et al.* 2009, Lopatin  
105 *et al.* 2016, Peura *et al.* 2016, Thers *et al.* 2017, Mao *et al.* 2018). As a relatively new  
106 methodology, biodiversity studies that employ LiDAR have been limited in scope, typically  
107 addressing only one taxonomic group or habitat type at the local scale, and strongly biased  
108 towards forest ecosystems. However, studies using LiDAR-based indicators have already  
109 been shown to explain up to 66% and 82% of local plant and fungi richness, respectively  
110 (Lopatin *et al.* 2016, Peura *et al.* 2016, Thers *et al.* 2017). A recent study has demonstrated its  
111 potential to provide spatially accurate and comprehensive measures by predicting the local  
112 biodiversity of different taxonomic groups (plants, fungi, lichens, and bryophytes) across  
113 multiple habitat types and large geographic extent (Moeslund *et al.* 2019). LiDAR may also  
114 be a useful tool in studying dark diversity by incorporating potentially important  
115 spatiotemporal dynamics such as succession and disturbance (Mokany and Shine 2003, Scott  
116 *et al.* 2011, Pärtel *et al.* 2013). For example, recent studies have found that human impact  
117 increases dark diversity in arbuscular mycorrhizal fungi (Pärtel *et al.* 2017a), that ruderal  
118 plants are more likely to be in dark diversity (Moeslund *et al.* 2017), and that human density  
119 and agricultural land-use influence dark diversity of vascular plants (Riibak *et al.* 2017).

120 Alongside these structural and environmental factors, fungal diversity depends on  
121 biotic interactions, with a large proportion of fungi deriving their nutrients and carbon from  
122 host plants (Tedersoo *et al.* 2014, Nguyen *et al.* 2016). Recent evidence has hinted on the  
123 influence of these interactions on dark diversity, as plant species dependent on mycorrhiza  
124 have been found to have greater dark diversity than those without these mutualist  
125 relationships (Moeslund *et al.* 2017). Moreover, ectomycorrhizal fungal diversity seems to  
126 increase exponentially with an increasing proportion of their host plants, suggesting that  
127 competitive interactions among fungi might also drive their dark diversity (Pärtel *et al.*  
128 2017b). Typical and strong species interactions are indeed typically considered in dark

129 diversity, as the estimation hereof is usually based on species co-occurrences (Beals 1984,  
130 McCune 1994, Münzbergová and Herben 2004, de Bello *et al.* 2012, Lewis *et al.* 2016).  
131 However, this is usually done only within the species group being studied. For example, in  
132 studies of plant dark diversity, only co-occurrences with other plants, and not fungi or other  
133 species groups, are typically considered. However, recognizing the close and interconnected  
134 relationship between plants and fungi allows for stronger and more realistic estimations of the  
135 fungal dark diversity. Incorporating other taxonomic groups when determining species pools  
136 and estimating dark diversity is not a new insight, and the importance of biotic interactions  
137 across trophic groups has been discussed since the concept of dark diversity was first  
138 introduced (Pärtel *et al.* 2011). Yet, such cross-species group data has never been included in  
139 dark diversity estimates meaning that they may not sufficiently account for cross-species  
140 group interactions, and this may be part of the explanation for why dark diversity is  
141 sometimes over-estimated (Boussarie *et al.* 2018).

142 In this study, we examined a number of environmental factors influencing the local  
143 dark diversity of fungi across habitat-types nationwide within Denmark. We used a  
144 comprehensive biodiversity datasets covering major environmental gradients (Brunbjerg *et al.*  
145 *et al.* 2019) and combined it with LiDAR-based measurements. We also included fungi-plant-  
146 co-occurrence information to estimate local fungal dark diversity and thereby acknowledge  
147 the importance of their biotic interactions. More specifically, we addressed the following  
148 questions: 1. To what degree can we explain local fungal dark diversity by abiotic and biotic  
149 environmental factors? 2. Can vegetation and terrain structural factors that are important to  
150 local fungal dark diversity be derived from LiDAR and if so, 3. how important are they  
151 compared to field-measured factors?

## 152 **Methods**

### 153 *Study area and site selection*

154 The dataset was collected from a national biodiversity inventory in Denmark as part  
155 of the “Biowide” research project (Brunbjerg *et al.* 2019). A total of 130 study sites (40 × 40  
156 m) were selected with a minimum distance of 500 m between each to reduce spatial  
157 covariance with 30 sites allocated to cultivated habitats and 100 sites to natural habitats  
158 (Figure 1). The cultivated subset was stratified according to the type of land use and the  
159 natural subset was selected amongst uncultivated habitats and stratified according to  
160 gradients in soil fertility, soil moisture, and successional stage. The “Biowide” project

161 deliberately excluded saline and aquatic habitats but included temporarily inundated  
162 depressions along with mires, bogs, and fens. The final set of 24 habitat strata consisted of  
163 three types of fields (rotational, grass leys, set aside) and three types of plantations (beech,  
164 oak, spruce), and the remaining 18 strata were natural or semi-natural habitats, constituting  
165 all possible combinations of positions along three major natural environmental gradients: soil  
166 fertility (rich, poor), soil moisture (dry, moist, wet), and successional stage (early, mid, late).  
167 These 24 strata were replicated in five geographical regions in Denmark. The “Biowide”  
168 dataset also includes a subset of 10 sites (two in each region) of hotspots for different  
169 taxonomic groups in Denmark, which were selected by voting amongst active naturalists in  
170 the Danish conservation and management societies. For further details on the design and data  
171 collection procedures see Brunbjerg *et al.* (2019).

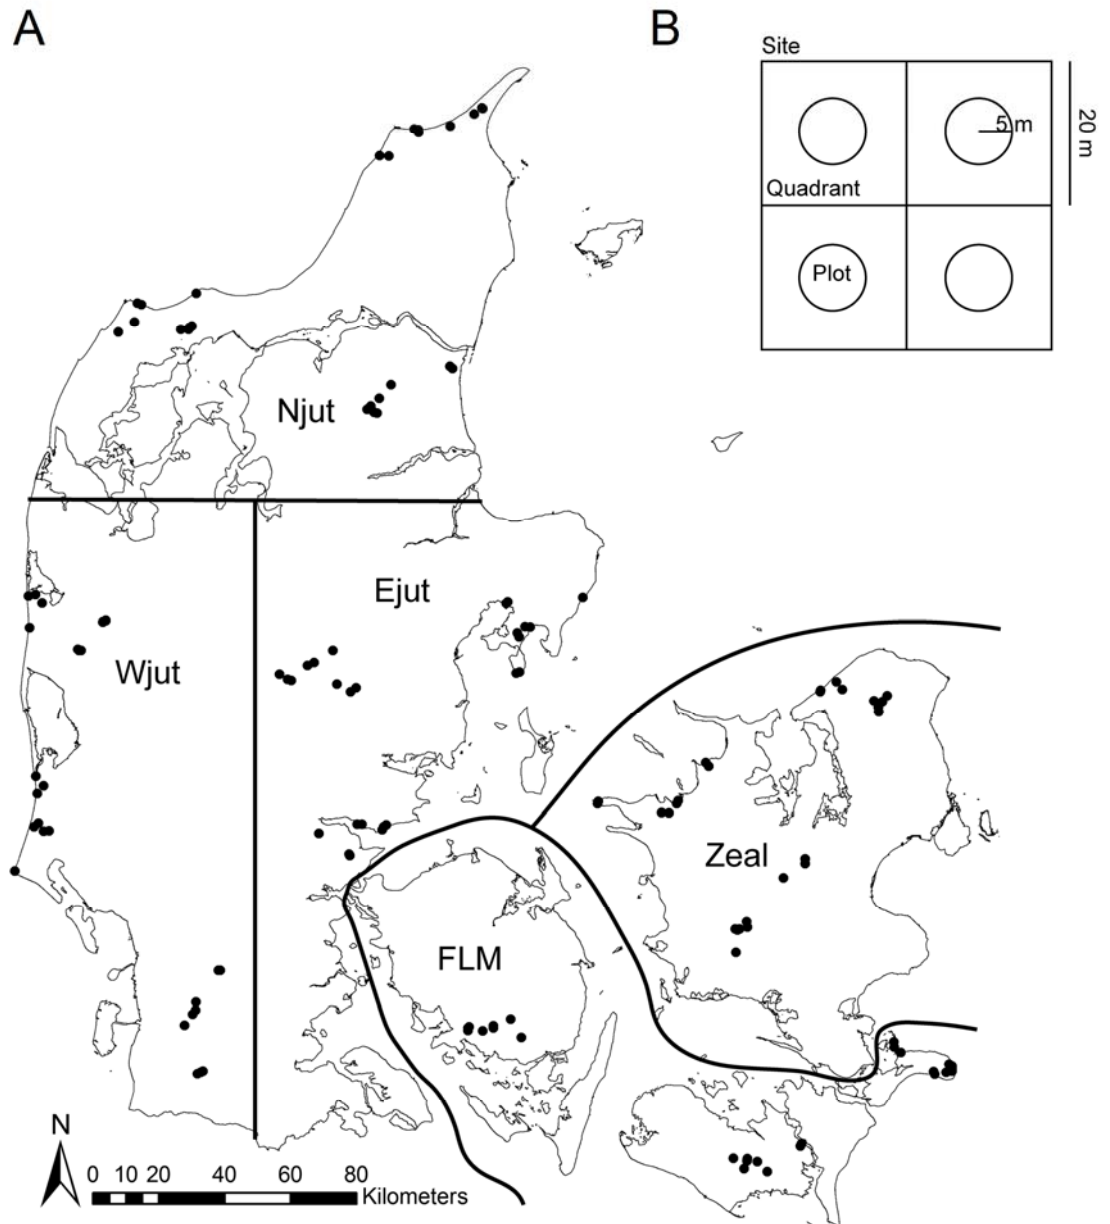

172  
173 Figure 1. The (A) 130 selected study sites from a national biodiversity inventory and (B) the  
174 four quadrants and 5m circle plots within each site. Reprinted from Ejrnæs *et al.* (2018),  
175 with permission from Elsevier.

### 176 *Field-measured variables*

177 We used fungi observational data from the “Biowide” field inventories (summarized  
178 data and additional details in Brunbjerg *et al.* (2019)). Macro-fungal species were surveyed in  
179 2014–2015 by an expert field-mycologist and volunteers during three inventories (up to one



180 hour per site) in the main fruiting season (August - November) by actively searching  
181 microhabitats and substrates (soil, herbaceous vegetation and debris, dead wood, litter, and  
182 bark of trees up to 2 m) within the 40 × 40 m sites. Since truffles are difficult to find, we did  
183 not consider these in this study. Subspecies and varieties were lumped to the species level.  
184 After pre-processing, the dataset consisted of 6,269 observations of 1,017 species.

185 Vascular plant species observations were also taken from the “Biowide” database and  
186 were originally inventoried by trained botanists during the summer 2014 and spring 2015 to  
187 account for variations in phenology. We removed hybrids and neophytes (i.e. species that are  
188 not considered a natural part of the vegetation given their history and dispersal ability, see  
189 appendix tables 6–8 in Buchwald *et al.* (2013)) and lumped subspecies and varieties to the  
190 species level. Species nomenclature for both plants and fungi follow the species checklist of  
191 Denmark (allearter.dk).

192 Apart from the LiDAR-based measures (detailed below), we also considered field-  
193 measured variables representing both abiotic conditions and available biotic resources known  
194 to influence fungal diversity and communities (Table 1). For further details on data collection  
195 and how the environmental field measurements were made see Brunbjerg *et al.* (2019).



196 Table 1. Overview of the explanatory variables for fungal dark diversity models along with our hypothesized relationship with dark  
 197 diversity. If the standard deviation of a variable was calculated, in addition to its mean, the variable is denoted with an asterisk.

|                      | Explanatory variables                          | Hypothesis                                                                                                                                                                                                                                                                                                                                              | References                                                            |
|----------------------|------------------------------------------------|---------------------------------------------------------------------------------------------------------------------------------------------------------------------------------------------------------------------------------------------------------------------------------------------------------------------------------------------------------|-----------------------------------------------------------------------|
| Field-based measures | Plant richness                                 | High plant richness could mean higher community stability or reflect low human impact. This would result in a lower dark diversity                                                                                                                                                                                                                      | (Kuiters 2013, Pellkofer <i>et al.</i> 2016, Yang <i>et al.</i> 2018) |
|                      | Litter (open habitats) and dead wood (forests) | The more substrate represented by more organic matter gives more resources for fungi and hence a lower dark diversity. Alternatively, organic matter increases competition between fungi and soil bacteria or causes many unfilled microhabitats which would increase dark diversity                                                                    | (Leigh <i>et al.</i> 2011, Averill <i>et al.</i> 2014)                |
|                      | Soil pH                                        | Despite increasing importance of bacteria and invertebrates in decomposition with increasing soil pH, we also expect less dominance and better opportunities for fungal colonization as the base-rich soil environment is less restrictive, where only few species can cope with low pH values, possibly resulting in a lower dark diversity at high pH | (Clark 1997, Rousk <i>et al.</i> 2009, Rousk <i>et al.</i> 2010)      |
|                      | Soil fertility index (SFI)                     | Asymmetric competition among vascular plants                                                                                                                                                                                                                                                                                                            | (Buckland and Grime 2000, Liu <i>et</i>                               |

|                      |                           |                                                                                                                                                                                                                                                                                                                                                                               |                                                                                         |
|----------------------|---------------------------|-------------------------------------------------------------------------------------------------------------------------------------------------------------------------------------------------------------------------------------------------------------------------------------------------------------------------------------------------------------------------------|-----------------------------------------------------------------------------------------|
|                      |                           | increases with increasing soil fertility leading to loss of plant richness at high fertility levels and therefore potentially also increasing dark diversity                                                                                                                                                                                                                  | <i>al.</i> 2015, Nadeau and Sullivan 2015, Luo <i>et al.</i> 2017)                      |
|                      | Soil moisture index (SMI) | Most fungi thrive at intermediate soil moisture levels, but have a rapid and opportunistic growth response to high moisture. Assuming establishment is easier in intermediate moist environments dark diversity could be higher at high moisture. Alternatively, dark diversity could be high at intermediate moisture levels as this could yield many unfilled microhabitats | (Jacobson 1997, Kennedy and Peay 2007)                                                  |
| LiDAR-based measures | Vegetation height*        | Taller vegetation could reflect encroachment by shrubs and trees in open habitats and forests resulting in more available microhabitats for potential fungal species increasing their dark diversity                                                                                                                                                                          | (Zuo <i>et al.</i> 2016, Gómez <i>et al.</i> 2019)                                      |
|                      | Succession (Amplitude)    | Amplitude could reflect successional processes with later successional stages allowing fungi to become more established, resulting in lower dark diversity                                                                                                                                                                                                                    | (Fernández-Toirán <i>et al.</i> 2006, Twieg <i>et al.</i> 2007, Hui <i>et al.</i> 2017) |

|                                                                                                                                                                                      |                                                                                                                                                                                                                                                                                                                  |                                                                                                  |
|--------------------------------------------------------------------------------------------------------------------------------------------------------------------------------------|------------------------------------------------------------------------------------------------------------------------------------------------------------------------------------------------------------------------------------------------------------------------------------------------------------------|--------------------------------------------------------------------------------------------------|
| <p>Microtopography</p> <ul style="list-style-type: none"> <li>-Terrain roughness (SigmaZ)</li> <li>-Terrain openness*</li> </ul>                                                     | <p>Microtopography increases availability of microhabitats and hence could increase dark diversity</p>                                                                                                                                                                                                           | <p>(Cantelmo Jr and Ehrenfeld 1999)</p>                                                          |
| <p>Light/heat</p> <ul style="list-style-type: none"> <li>- Canopy openness (forests)*</li> <li>-Heat load index*</li> <li>-Solar irradiation*</li> <li>-Vegetation cover*</li> </ul> | <p>Light availability increases fungal establishment success which would decrease dark diversity</p>                                                                                                                                                                                                             | <p>(Graham <i>et al.</i> 1982, Turner <i>et al.</i> 2009)</p>                                    |
| <p>Canopy complexity</p> <ul style="list-style-type: none"> <li>-Echo ratio*</li> </ul>                                                                                              | <p>Canopy complexity provides more niches directly in the canopy and could also be expected to be associated with a higher variation in the forest floor with small openings in the canopy and variation in tree ages. This could increase the number of unfilled microhabitats and hence the dark diversity</p> | <p>(Unterseher and Tal 2006, Gómez-Hernández and Williams-Linera 2011, Dove and Keeton 2015)</p> |

---

198 ***LiDAR-based measures***

199 To enable the calculation of measures representing vegetation and terrain environmental  
200 and structural aspects, we used the latest nationally covering LiDAR-based point cloud for  
201 Denmark from the Danish Ministry of Environment. This dataset is freely available from  
202 [www.kortforsyningen.dk](http://www.kortforsyningen.dk) and has a point density of 4-5 points/m<sup>2</sup>. Originally, this dataset was  
203 recorded from fixed-wing airplanes at an altitude of approximately 680 m above ground level  
204 and a speed over ground of approximately 240 km/h. The data was recorded by Riegl LMS-680i  
205 scanners operating in the near-infrared wavelength (1550 nm) in a parallel line scan pattern  
206 during the springs and autumns of 2014 and 2015. For all calculations, we relied on the  
207 classification of points into ground, building and vegetation classes already present in the data  
208 set upon download.

209 To represent vegetation and terrain environmental and structural aspects, we calculated  
210 observed measures based on the point cloud data set. We calculated all measures at 1.5 m  
211 resolution (except for terrain roughness which was at 0.5 m resolution) and their means and  
212 standard deviations within 30 m radius circles centered in each study site. For all LiDAR  
213 processing and calculation, we used the OPALS tools (Pfeifer *et al.* 2014) version 2.3.1 in a  
214 Python 2.7 environment.

215 ***Vegetation-related measures***

216 To represent *succession* and to some degree moisture balance in both vegetation and soil,  
217 we used the amplitude of each echo representing a point in the LiDAR point cloud. This  
218 amplitude is high if the reflecting surface is flat (i.e., smooth) and with high reflectivity. It is low  
219 when the light energy is distributed between several returns for example in tree canopies, or  
220 when surfaces have low reflectivity, are complex, or translucent (e.g., leaves). The wavelength  
221 used to record the point cloud data is sensitive to leaf water content (Junttila *et al.* 2018) and soil  
222 moisture (Zlinszky *et al.* 2014). Since the amplitude depends on reflectivity, which varies across  
223 months and aircraft types (slightly different flying heights) used for data recording, the amplitude  
224 was corrected to account for these biases. We constructed a Generalized Linear Model (GLM)  
225 with Gaussian link having the raw amplitude as response and flight month as well as aircraft type  
226 as explanatory factors and used only the residuals of this model for input in our statistical  
227 modelling. We also tried using flight year as an explanatory factor, but this did not improve the

228 model ( $\Delta AIC < 2$ ). These residuals will be referred to as the *corrected amplitude* in the  
229 following. Unfortunately, we did not have reference data enabling a full calibration of this  
230 measure (Höfle and Pfeifer 2007).

231 To represent *vegetation height*, we estimated this measure by subtracting the terrain  
232 model from the surface model (two raster files, detailed in the following). The terrain model  
233 (DTM) calculation details are given in the section on “Terrain-structure measure”. The surface  
234 model was calculated using the DSM module in OPALS using all vegetation and ground points.

235 To reflect the penetrability and succession of the vegetation we calculated the *echo ratio*  
236 (Höfle *et al.* 2012). Echo ratio is high where the surface is impenetrable and relatively smooth  
237 and lower where the surface is uneven or penetrable. In order to calculate the echo ratio,  
238 estimating normals for each point is required. We did this using the Normals module in OPALS  
239 with a robust plane fit based on the 12 nearest neighboring points. Subsequently, we calculated  
240 the echo ratio for each terrain and vegetation point using a search radius of 1.5 m along with the  
241 slope adaptive method implemented in the EchoRatio module of OPALS.

242 To estimate light conditions, we calculated the *canopy openness* for all points categorized  
243 as “ground”, but contrary to terrain openness (see below), we calculated this considering  
244 vegetation points as well. Therefore, canopy openness represents the actual blocking of the sky  
245 view by the canopy around each ground point. Canopy openness is high for ground points inside  
246 canopy gaps and low for ground points beneath a closed canopy.

247 Lastly, as an estimate of *vegetation cover*, we calculated the fraction of vegetation points  
248 to all points (excluding unclassified points and those representing buildings and noise). This  
249 measure will be high if the vegetation is dense or the cover of vegetation is relatively high, and  
250 low for areas with no vegetation.

### 251 *Terrain-structure measures*

252 To enable the calculation of several terrain-related measures, we calculated a digital  
253 terrain model (DTM) for each study site representing the elevation above sea level. To do this we  
254 used the DTM module of OPALS based on only ground points. We set the module to use 8  
255 neighboring points and a search radius of 6 m. To represent key features of the local terrain (e.g.,  
256 soil moisture or heat balance (Moeslund *et al.* 2013)), we calculated *terrain slope* and *terrain*

257 *aspect* (used for heat load index calculation, see below). For this task, we used the GridFeature  
258 module of OPALS using the DTM as input, a kernel size of 1 and requesting the terrain slope  
259 and aspect (slope direction) in radians.

260 To reflect local heat input, we calculated the *heat load index* based on the terrain aspect  
261 following the heat load index formula in McCune and Keon (2002). This index reaches  
262 maximum values on southwest-facing slopes and zero on northeast-facing slopes. We also  
263 calculated the potential *solar irradiation* based on terrain slope, aspect, and latitude following  
264 equation 3 in McCune and Keon (2002).

265 To estimate micro-scale terrain heterogeneity, we calculated the *terrain roughness*  
266 (SigmaZ) using only ground points as input. This measure represents the standard deviation of  
267 the interpolated grid height. The OPALS DTM module outputs this measure as a by-product  
268 when constructing a DTM. However, unlike the rest of the LiDAR measures in this study, the  
269 terrain roughness was calculated at  $0.5 \times 0.5$  m resolution mirroring micro-scale terrain  
270 variations.

271 To represent site-scale terrain heterogeneity, we calculated the *terrain openness* (Doneus  
272 2013). Terrain openness is defined as the opening angle of a cone (having the radius of the  
273 kernel) turned upside down – with its tip restrained to the point of interest – that touches the  
274 terrain surface. To calculate this, we used the PointStats module of OPALS requesting “positive  
275 openness” based on only ground points and a search radius of 5 m. This measure is high in flat  
276 (relative to the scale at which it is calculated) areas and low in heterogeneous terrains.

277 Finally, to test the importance of variability in the LiDAR measures we calculated the  
278 standard deviation for LiDAR measures for which we believed it made ecological sense (Table  
279 1).

## 280 ***Data analysis***

### 281 *Data preparation*

282 Prior to statistical analysis, we removed the six intensively managed fields from the study  
283 sites, as these were ploughed fields. We also removed two study sites because they were flooded  
284 during the LiDAR data recording period. Finally, we removed one site due to an extreme outlier

285 in the LiDAR amplitude values (300 vs. a range of values between 10 and 130). Our final dataset  
286 therefore comprised a total of 121 study sites.

287 Our initial visual inspection of the data revealed that many of the LiDAR measures were  
288 relevant only for woodlands and therefore strongly zero-inflated in the open landscapes. The  
289 analyses in this study were therefore separately run for open habitats and woodlands. Open  
290 habitats included grasslands, fens, bogs, and other habitats with only few sporadic occurrences of  
291 trees. The woodlands dataset consisted of forests, thickets and shrubland (e.g. willow).

292 In the following, we detail the steps we took to prepare the LiDAR and measured  
293 variables for statistical modelling as explanatory factors. Obviously, a number of these variables  
294 were strongly inter-correlated (Appendix 1). For example, echo ratio was strongly related to  
295 canopy and light measures (Appendix 1). Therefore, we selected only those variables that we  
296 hypothesized to affect local fungal dark diversity (See Table 1). Subsequently, to avoid issues  
297 with multi-collinearity we calculated Variance Inflation Factors (VIFs) causing us to remove  
298 vegetation height as an explanatory factor for the open landscapes to ensure VIF values below 10  
299 following Kutner *et al.* (2005). Subsequently, the maximum VIF value of explanatory factors  
300 used together in the same models was 4.8 and 5.7 for woodlands and open habitats respectively.  
301 We scaled all explanatory variables to a mean of zero and a standard deviation of one. To strive  
302 for normal distribution of explanatory variables we log- or square-root transformed those where  
303 this made obvious distributional improvements based on visual examination of the histograms.

304



305 **Appendix 1.** Correlation plot between environmental and LiDAR variables. All significant  
 306 interactions are colored red for negative relationships and blue for positive relationships, with the  
 307 size and darkness of the color representing the strength of the relationship. Non-significant  
 308 correlations are blank.

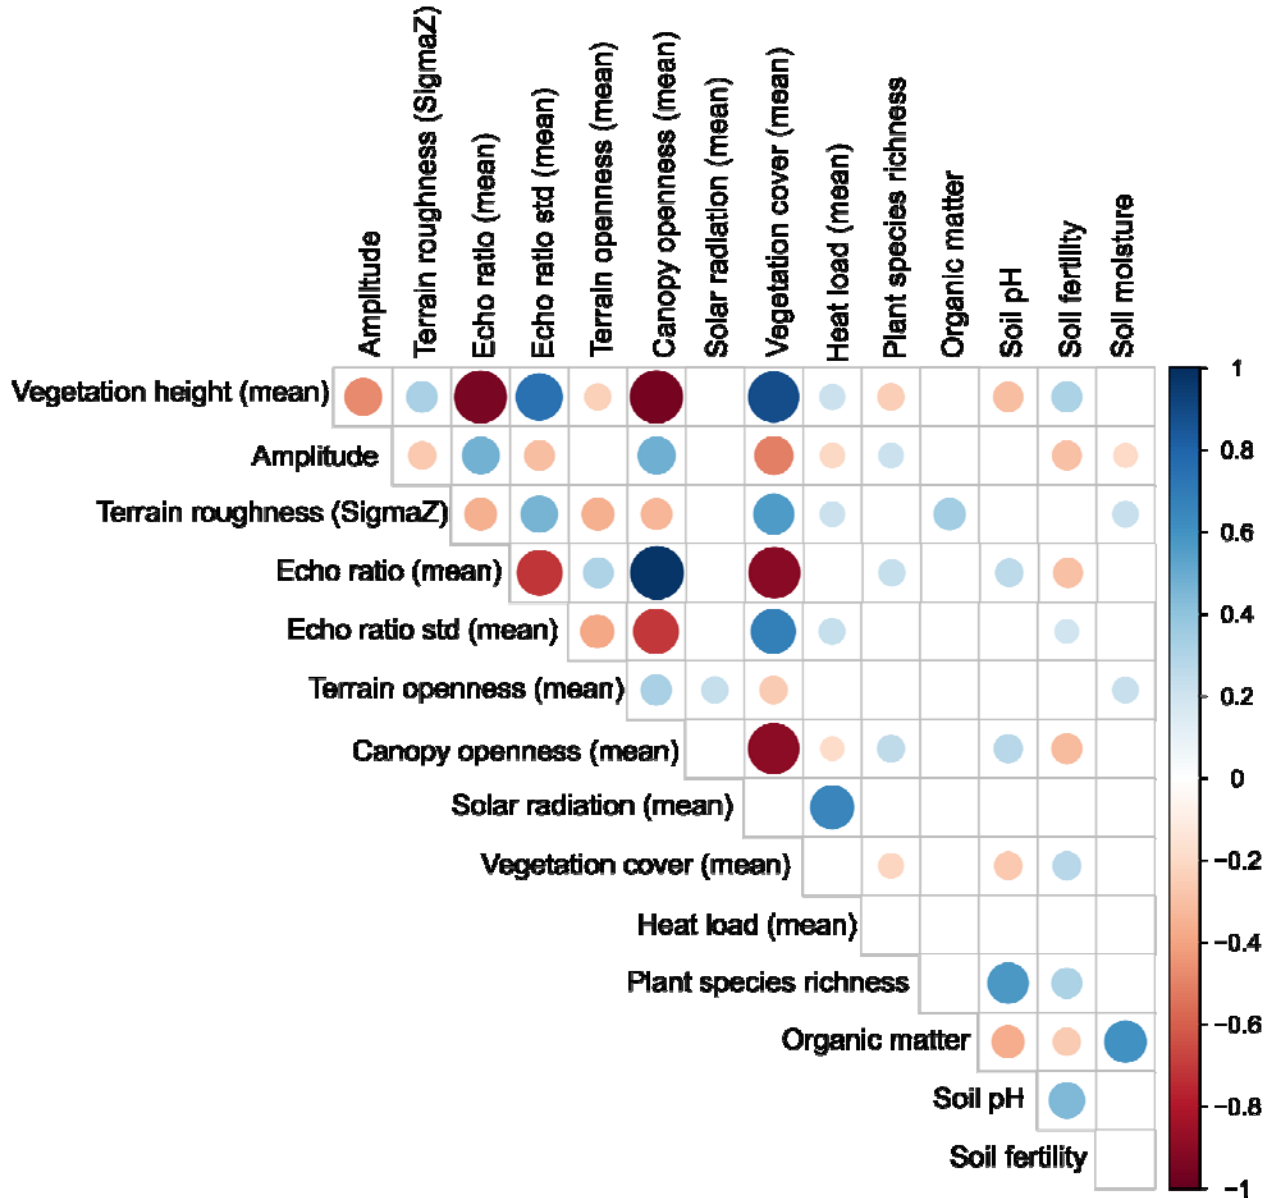

309

310

311 Dark diversity

312 All statistical analyses mentioned in the following were performed in R version 3.5.3 (R  
 313 Core Team 2019). To calculate the dark diversity for each site, we first calculated the site-  
 314 specific species pool using the Beals' index (Beals 1984), as recommended by Lewis *et al.*

315 (2016), using the ‘beals’ function in the ‘vegan’ package (Oksanen *et al.* 2017). The Beals’ index  
316 represents the probability that a particular species will occur within a given site based on the  
317 assemblage of co-occurring species (Beals 1984, McCune 1994, Münzbergová and Herben  
318 2004). The threshold used for including a particular species in the site-specific species pool was  
319 the 5<sup>th</sup> percentile of the Beals’ index value for each species (Gijbels *et al.* 2012, Ronk *et al.*  
320 2015). Preceding the calculation of each threshold, the lowest Beals’ index value among plots  
321 with the occurrence of the species in question was identified, and all plots having values below  
322 the minimum were not considered. We calculated two measures of the site-specific species pool  
323 for each site: (1) using only fungi co-occurrence and (2) co-occurrences of both observed fungi  
324 and vascular plants at each site to acknowledge the fungal-plant linkages (i.e., both fungi and  
325 plant species were in the presence/absence matrix used to calculate Beals’ index). Dark diversity  
326 was calculated by subtracting observed fungal species richness from the site-specific species  
327 pool. Since site-specific species pools differ between sites, we calculated the *relative dark*  
328 *diversity* for each site as dark diversity (species predicted from the site-specific species pool but  
329 not observed) divided by the regional pool to enable comparison of results across habitats.

### 330 Statistical analysis

331 To investigate what characterizes sites with a high fungal dark diversity we constructed  
332 GLMs with a Gaussian link having the estimated relative dark diversity (described above) as the  
333 response variable. We constructed models for both open habitats and woodlands, and for both  
334 dark diversity estimates (see the section on dark diversity). Initially, we fitted models using only  
335 the LiDAR measures as explanatory factors, to test the degree to which fungal dark diversity  
336 patterns could be explained using LiDAR data alone. Subsequently, we fitted a similar model  
337 with both measured and LiDAR variables as explanatory factors (Table 1), giving insight into  
338 how much more explanatory power one gains by using measured variables in addition to LiDAR.  
339 To allow for non-linear relationships for variables corresponding to the intermediate disturbance  
340 hypothesis (Connell 1978, Townsend *et al.* 1997) and intermediate productivity hypothesis  
341 (Fraser *et al.* 2015), we used Akaike’s Information Criterion (AIC) (Burnham and Anderson  
342 2002) to evaluate if inclusion of squared terms for the variables SMI, SFI, light, soil pH, and  
343 bare soil (see Table 1) improved the model fit. If so, we kept the squared term of the variable in  
344 question instead of the linear effect. After the initial fit and checking for non-linearity as

345 described above, we ran a backward model selection procedure for each model based on AIC.  
346 The procedure stopped when AIC did not drop anymore and  $\Delta AIC$  was above 2 (Burnham and  
347 Anderson 2002). In each iteration, we dropped the variable causing the smallest change in AIC  
348 value. As a final step, we checked model residuals to ensure that these were normally distributed.  
349 We did not conduct spatial modelling in this study, since the original field-work design lying  
350 behind the data was designed to avoid spatial autocorrelation, and tests for all the species groups  
351 originally inventoried concluded that spatial signals were of minor to little importance (see  
352 Brunbjerg *et al.* (2019), and also “Study area and site selection”).

### 353 **Results**

354 The two relative fungal dark diversity estimates (based on fungi-only and both fungi- and  
355 plant co-occurrences) were between 0.17 – 0.93 (open habitats, median 0.51) and 0.20 – 0.63  
356 (woodland, median: 0.39); and 0.21 – 0.95 (open habitats, median: 0.56) and 0.24 – 0.7  
357 (woodland, median: 0.44) respectively. In most cases, our models explained between 20-30 % of  
358 the variation in fungal dark diversity and more than 40 % for the woodlands models when  
359 including both LiDAR and measured variables (Table 2). In the “fungi-only dark diversity”  
360 model for woodland habitats (Table 2) the squared term of soil pH did improve model fit, but  
361 this term was left out during the subsequent model selection procedure.

362 The only LiDAR variable significant in both open habitats and woodlands was amplitude,  
363 which was significant in all models for woodlands and in LiDAR-only models for open habitats  
364 (Table 2). This variable had a positive effect on dark diversity in woodlands (Table 2) but a  
365 negative influence in open habitats (Table 2). Echo ratio was the only other significant LiDAR  
366 variable in our analyses and positively influenced dark diversity in open habitats (Table 2). Plant  
367 richness was negatively related to local fungal dark diversity and had the strongest impact of all  
368 the field-measured factors included in our analyses (Table 2). Also, soil fertility and moisture  
369 were positively correlated with fungal dark diversity in open habitats (Table 2).

370 In all cases, models considering only the structural environment (LiDAR only) were  
371 outperformed by models considering plant richness and the abiotic environment in addition to  
372 the structural, notably in the open habitats (Table 2). Appendix 1 shows all pair-wise Spearman  
373 correlations between the explanatory variables used and Appendix 2 shows observed fungi  
374 richness against the two dark diversity measures for both open and woodland habitats.

375

376 Table 2. Modelling coefficients for the best models (i.e. after model selection) regressing dark diversity estimates based on only fungi  
 377 co-occurrences (*Fungi-only dark diversity*) or based on both fungi and plant co-occurrences (*Fungi-plant dark diversity*) against the  
 378 selected explanatory variables. Significant variables were from either a LiDAR-only or a full model with both LiDAR-based and field-  
 379 measured predictors.

|                   |                            |                  | LiDAR variables |           |            | Field-measured variables |                |               |
|-------------------|----------------------------|------------------|-----------------|-----------|------------|--------------------------|----------------|---------------|
|                   |                            |                  | R <sup>2</sup>  | Amplitude | Echo ratio | Plant richness           | Soil fertility | Soil moisture |
| Woodland habitats | Fungi-only dark diversity  | Lidar-only model | 0.24            | 0.03      | -          | -                        | -              | -             |
|                   |                            | Full model       | 0.40            | 0.04      | -          | -0.05                    | -              | -             |
|                   | Fungi-plant dark diversity | Lidar-only model | 0.23            | 0.03      | -          | -                        | -              | -             |
|                   |                            | Full model       | 0.44            | 0.04      | -          | -0.05                    | -              | -             |
| Open habitats     | Fungi-only dark diversity  | Lidar-only model | 0.10            | -0.05     | 0.01       | -                        | -              | -             |
|                   |                            | Full model       | 0.30            | -         | 0.01       | -0.08                    | 0.06           | 0.04          |
|                   | Fungi-plant dark diversity | Lidar-only model | 0.07            | -0.04     | 0.01       | -                        | -              | -             |
|                   |                            | Full model       | 0.34            | -         | 0.01       | -0.10                    | 0.06           | -             |

380 **Appendix 2.** Relationship between observed fungal diversity and dark diversity estimates in  
381 woodland based on (A) only fungi co-occurrences (*Fungi-only dark diversity*) or (B) fungi and  
382 plant co-occurrences (*Fungi-plant dark diversity*), and in open habitats based on (C) only fungi  
383 co-occurrences (*Fungi-only dark diversity*) or (D) fungi and plant co-occurrences (*Fungi-plant*  
384 *dark diversity*).

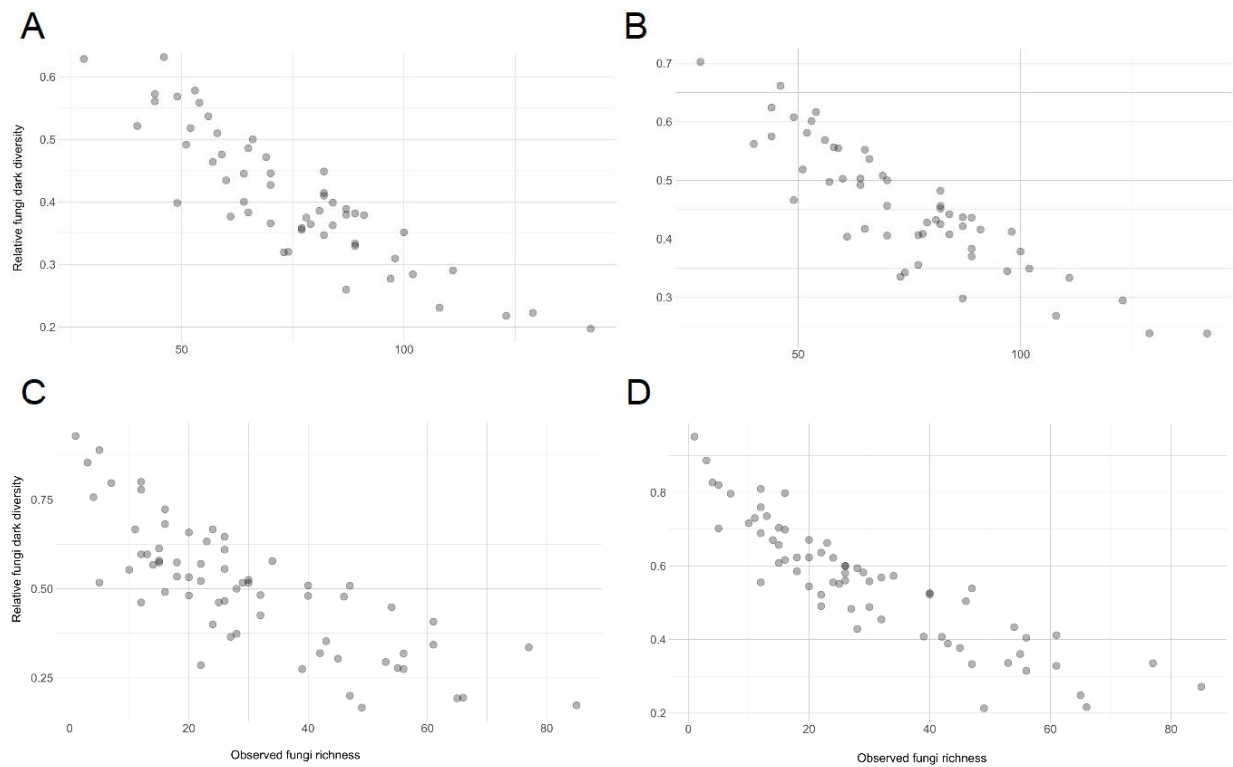

385

## 386 Discussion

387 In this study, we demonstrate for the first time that LiDAR derived variables, alone and  
388 in combination with field-measured variables, can explain a significant amount of the variation  
389 in local dark diversity of temperate macro-fungal communities. Our findings indicate that the  
390 dark diversity of fungi is influenced by the local vegetation structure, plant associations, and the  
391 abiotic environment. This is not surprising since local observed fungal diversity is also  
392 determined by these factors to a large degree (Thers *et al.* 2017, Yang *et al.* 2017, Moeslund *et*  
393 *al.* 2019). Indeed, the relative dark diversity analyzed in this study correlated with the observed  
394 fungal species richness (Appendix 2), which was expected given that the dark diversity  
395 calculations are based on the species present (Noreika *et al.* 2020). On the other hand, there are

396 differences between these two measures, so the results presented here are not necessarily  
397 applicable to the observed fungal diversity. We also find that models including field-based  
398 variables explained the dark diversity of fungi far better than models relying solely on LiDAR,  
399 notably in open landscapes. While LiDAR has the advantage that one can record data from huge  
400 areas in very fine detail for relatively low cost, our results indicates that to get the best  
401 explanation of local fungal diversity patterns fieldwork is still needed.

#### 402 *LiDAR-based measures*

403 This study shows that LiDAR captures habitat characteristics potentially important for  
404 fungal dark diversity which are not represented by traditional field-measured variables. Notably,  
405 the relationship between fungal dark diversity and LiDAR-derived vegetation structure in  
406 woodlands was relatively strong. Although LiDAR can successfully quantify biophysical  
407 characteristics in all types of habitats, it is known to be more effective in forested habitats (Su  
408 and Bork 2007), supporting these findings. The most important LiDAR variables for modelling  
409 fungal dark diversity were amplitude and echo ratio which gives us important insights into what  
410 environmental aspects, which are not typically recorded in field-surveys, can be captured by a  
411 LiDAR approach.

412 The LiDAR measure of amplitude is sensitive both to surface reflectivity and to the  
413 number of targets hit by the laser pulse (Moeslund *et al.* 2019). The lower the reflectivity and the  
414 more targets between which the light energy is distributed, the lower the amplitude associated  
415 with a given point. This would result in high amplitudes in flatter surfaces while yielding low  
416 amplitudes in tall and more complex canopies, or translucent surfaces such as leaves. Hence, this  
417 variable can be a proxy for succession stage, surface evenness, or vegetation density; since both  
418 flat and sparsely vegetated as well as densely vegetated canopies preventing light penetration  
419 will yield high amplitude. Supporting this, amplitude was positively correlated with vegetation  
420 height and vegetation cover (denser vegetation resulted in higher amplitude) and negatively  
421 correlated with echo ratio (vegetation complexity, see below) and canopy openness. In  
422 woodlands, the dark diversity of fungi was positively related to amplitude, suggesting that more  
423 species are missing in the relatively tall and dense forests compared to more complex woodlands  
424 (e.g., with canopy openings). The positive association between LiDAR amplitude and dark  
425 diversity could therefore be a consequence of communities in older well-developed shrubland or

426 old-growth forests with windthrows or other openings, having allowed fungi more time to  
427 become established with their associated plants (Fernández-Toirán *et al.* 2006, Twieg *et al.*  
428 2007). Indeed, among the top half of woodland plots with regards to amplitude were plantations  
429 (which often have dense canopy and equal-aged trees) and most of them contained high relative  
430 fungal dark diversity, while the bottom half of the plots, those having the lowest amplitude and  
431 dark diversity, were mostly old forests or shrublands with a more well-developed vegetation  
432 structure (e.g., dead or fallen wood, or complex sub-canopy layer).

433 In open habitats, amplitude and echo-ratio were negatively and positively related to  
434 fungal dark diversity, respectively. These results indicate that fewer species are missing from the  
435 more even early-successional grasslands without trees and shrubs. We suggest this could be the  
436 result of encroachment due to the widespread abandonment of ancient grassland management  
437 practices resulting in a loss of small-statured typical grassland plant species without a  
438 corresponding gain in species associated with scrub and woodland. It could also reflect that  
439 fewer species are missing from calcareous or sandy grasslands since open limestone and white  
440 sand have a relatively high reflectivity.

#### 441 ***Plant richness***

442 The most important field-measured variable for modelling fungal dark diversity was plant  
443 species richness which was negatively related to dark diversity in both open habitats and  
444 woodlands. Plant richness and composition are well-known to correlate with fungal richness and  
445 composition (Zak *et al.* 2003, Chen *et al.* 2017, Yang *et al.* 2017, Brunbjerg *et al.* 2018, Wang *et*  
446 *al.* 2018), and sites with lower plant species richness have previously been found to have a  
447 relatively higher proportion of plants in the dark diversity (Fløjgaard *et al.* 2020). Here, the  
448 negative relation between plant richness and fungal dark diversity may be attributed to greater  
449 plant richness frequently associated with more stable communities and ecosystems (Kuiters  
450 2013, Pellkofer *et al.* 2016, Yang *et al.* 2018), which could indicate longer continuity and hence  
451 time for fungi to establish. Alternatively, host specific fungi species could be missing due to  
452 absence of their symbiotic plant species (Dickie 2007). However, in our study, plant richness had  
453 almost the same effect on both fungal dark diversity accounting for present plant species and  
454 where these presences were unaccounted for. This points to plant hosts playing a minor role for  
455 fungal dark diversity, which is unsurprising as it likely indicates that the calculation of fungal



456 dark diversity using the Beals' index does not allow fungi having non-present hosts into the site-  
457 specific species pool. Another possible explanation is that plant richness mirrors human impact.  
458 Generally plant species richness have declined over several decades and continue to as a  
459 consequence of agricultural intensification and abandonment of extensive land-use (Hülber *et al.*  
460 2017). Other studies have found human disturbance to be strongly related to fungal richness and  
461 dark diversity patterns (Epp Schmidt *et al.* 2017, Pärtel *et al.* 2017a), and future studies may help  
462 to tease apart these effects.

### 463 ***Abiotic environment***

464 Soil fertility is often associated with fungal diversity (Balsler *et al.* 2005, Kalliokoski *et*  
465 *al.* 2010, Sterkenburg *et al.* 2015) and was found to have a positive relationship with dark  
466 diversity in open habitats. In general, soil fertility influences plant species richness negatively  
467 through asymmetric competition (Buckland and Grime 2000, Dybzinski *et al.* 2008, Nadeau and  
468 Sullivan 2015, Luo *et al.* 2017). This could explain the negative relationship between the local  
469 dark diversity of fungi and soil fertility: lower plant species richness yields a higher dark  
470 diversity (see discussion above on "Plant richness"). However, the effect might also be  
471 uncoupled from plants and simply due to changes in the soil decomposition microbiota from  
472 fungal to bacterial dominance along a gradient of soil fertility and pH (Blagodatskaya and  
473 Anderson 1998). Another alternative explanation is that soil fertility affects the density of soil  
474 mycophagous and microarthropod species (Cole *et al.* 2005) which also may affect fungal dark  
475 diversity (Crowther *et al.* 2013). However, while this explanation might be plausible, the  
476 underlying mechanisms are largely unknown, calling for further research to dissect the  
477 interactions between soil fertility, soil microarthropods and fungal diversity.

478 We also found soil moisture had a positive relationship with fungal dark diversity in open  
479 habitats. Moisture is known to influence fungal communities (Gómez-Hernández and Williams-  
480 Linera 2011, Gupta *et al.* 2018, Frøslev *et al.* 2019) as it affects the growth, colonization rate,  
481 and spore and fruit body production (Salusso and Moraña 1995, Jacobson 1997, Kennedy and  
482 Peay 2007). The relationship between fungi and plants is probably important in this regard  
483 because soil moisture causes a high turnover in plant species composition (e.g., Moeslund *et al.*  
484 (2013), and in turn, affects the quality and availability of resources for below-ground fungal  
485 communities (Chen *et al.* 2017). Additionally, high soil moisture is a strong environmental filter

486 excluding most macro-fungi species from the wet habitats (Heilmann-Clausen *et al.* 2019). This  
487 filter may also be the main reason for the higher fungal dark diversity found in the wet habitats  
488 when plant co-occurrences was not included in determining the site-specific species pool. On the  
489 other hand, the interdependencies between fungi and plants, and the strong link between plant  
490 communities and soil moisture gradients (Xiong *et al.* 2003, Silvertown *et al.* 2015, Valdez *et al.*  
491 2019), may explain why soil moisture was not significant in models where plant co-occurrences  
492 was included in determining the site-specific species pool, as this approach perhaps accounts for  
493 these interactions.

#### 494 **Uncertainties**

495 One drawback of basing a study on an organism group like fungi, which live a mostly  
496 hidden life, is the unavoidable issues concerning overlooked species and hidden diversity in  
497 general (Milberg *et al.* 2008, Abrego *et al.* 2016). If such errors are biased towards specific plots  
498 our results could be affected. However, the field-work behind the dataset used here was planned  
499 to avoid this exact issue by including several visits at each site at different times of the year, and  
500 we do not believe this confounds our findings. Nevertheless, there is always uncertainty when  
501 estimating unknowns, such as which species are actually absent despite the fact that they could  
502 indeed be in a given site. In this study we used on of the most comprehensive and best possible  
503 data set along with state-of-the-art methods to calculate these estimates (see e.g. (Lewis *et al.*  
504 2016, Moeslund *et al.* 2017), and we therefore believe our results are indeed sound and realistic  
505 despite this uncertainty.

#### 506 **Conclusion**

507 This is the first study to investigate potential drivers of the local dark diversity of fungi  
508 using both LiDAR derived vegetation and terrain structure as well as field-measured variables.  
509 We showed that local fungal dark diversity is strongly dependent on the environment with  
510 vegetation structure, plant diversity, and abiotic factors playing important roles. Also, to our  
511 knowledge, this is the first study using cross-species group co-occurrence data to determine  
512 species pools. This may be a more ecologically sound methodology than using only one taxon  
513 group, especially for interdependent taxonomic groups. Future studies and novel approaches will  
514 be required to unravel the causal links between fungal communities and habitat and vegetation  
515 characteristics; and to gain a better understanding of how LIDAR-based measures can be

516 interpreted as measures of vegetation and terrain structure. Using LiDAR as a tool to determine  
517 dark diversity, in conjunction with ecological field measurements, may provide a valuable tool to  
518 better guide conservation and restoration planning by identifying sites with high restoration  
519 potential (high dark diversity) and high priority for conservation (low dark diversity, or sites  
520 where the fungal communities are more “complete”).

## 521 **Acknowledgements**

522 We thank Thomas Læssøe for collecting and identifying macro-fungi. We sincerely thank Aage  
523 V. Jensen Nature Fund for financial support to CF, AKB, JM, LD, KC and JV through the  
524 project “Dark Diversity in Nature Management”. The Biowide project and REJ was supported by  
525 a grant from the Villum Foundation (VKR-023343). MP has been supported by the Estonian  
526 Ministry of Education and Research (IUT20–29), and the European Regional Development Fund  
527 (Centre of Excellence EcolChange). The authors declare no conflict of interest.

## 528 **Literature Cited**

- 529 Abrego, N., Halme, P., Purhonen, J. and Ovaskainen, O. (2016) 'Fruit body based inventories in  
530 wood-inhabiting fungi: Should we replicate in space or time?', *Fungal Ecology*, 20, 225-  
531 232.
- 532
- 533 Averill, C., Turner, B. L. and Finzi, A. C. (2014) 'Mycorrhiza-mediated competition between  
534 plants and decomposers drives soil carbon storage', *Nature*, 505(7484), 543-545.
- 535
- 536 Balsler, T. C., Treseder, K. K. and Ekenler, M. (2005) 'Using lipid analysis and hyphal length to  
537 quantify AM and saprotrophic fungal abundance along a soil chronosequence', *Soil  
538 Biology and Biochemistry*, 37(3), 601-604.
- 539
- 540 Beals, E. W. (1984) 'Bray-Curtis ordination: An effective strategy for analysis of multivariate  
541 ecological data' in MacFadyen, A. and Ford, E. D., eds., *Advances in Ecological  
542 Research* Academic Press, 1-55.
- 543
- 544 Blackwell, M. and Vega, F. E. (2018) 'Lives within lives: Hidden fungal biodiversity and the  
545 importance of conservation', *Fungal Ecology*, 35, 127-134.
- 546
- 547 Blagodatskaya, E. V. and Anderson, T.-H. (1998) 'Interactive effects of pH and substrate quality  
548 on the fungal-to-bacterial ratio and qCO<sub>2</sub> of microbial communities in forest soils', *Soil  
549 Biology and Biochemistry*, 30(10-11), 1269-1274.

- 550  
551 Boussarie, G., Bakker, J., Wangensteen, O. S., Mariani, S., Bonnin, L., Juhel, J.-B., Kiszka, J. J.,  
552 Kulbicki, M., Manel, S. and Robbins, W. D. (2018) 'Environmental DNA illuminates the  
553 dark diversity of sharks', *Science advances*, 4(5), eaap9661.
- 554  
555 Brunbjerg, A. K., Bruun, H. H., Broendum, L., Classen, A. T., Fog, K., Froeslev, T. G.,  
556 Goldberg, I., Hansen, M. D. D., Hoeye, T. T., Laessøe, T., Newman, G., Skipper, L.,  
557 Soechting, U. and Ejrnaes, R. (2019) 'A systematic survey of regional multitaxon  
558 biodiversity: evaluating strategies and coverage', *BMC Ecology*, 19(43), 158030.
- 559  
560 Brunbjerg, A. K., Bruun, H. H., Dalby, L., Fløjgaard, C., Frøslev, T. G., Høye, T. T., Goldberg,  
561 I., Læssøe, T., Hansen, M. D. and Brøndum, L. (2018) 'Vascular plant species richness  
562 and bioindication predict multi-taxon species richness', *Methods in Ecology and*  
563 *Evolution*, 9(12), 2372-2382.
- 564  
565 Brunbjerg, A. K., Bruun, H. H., Moeslund, J. E., Sadler, J. P., Svenning, J.-C. and Ejrnæs, R.  
566 (2017) 'Ecospace: A unified framework for understanding variation in terrestrial  
567 biodiversity', *Basic and Applied Ecology*, 18, 86-94.
- 568  
569 Buchwald, E., Wind, P., Bruun, H. H., Møller, P. F., Ejrnæs, R. and Svart, H. E. (2013) 'Hvilke  
570 planter er hjemmehørende i Danmark?', *Flora & Fauna*, 118, 73-96.
- 571  
572 Buckland, S. M. and Grime, J. P. (2000) 'The effects of trophic structure and soil fertility on the  
573 assembly of plant communities: a microcosm experiment', *Oikos*, 91(2), 336-352.
- 574  
575 Burnham, K. P. and Anderson, D. R. (2002) *Model Selection and Multi-model Inference: A*  
576 *Practical Information-Theoretic Approach*, New York: Springer.
- 577  
578 Cantelmo Jr, A. J. and Ehrenfeld, J. G. (1999) 'Effects of microtopography on mycorrhizal  
579 infection in Atlantic white cedar (*Chamaecyparis thyoides* (L.) Mills.)', *Mycorrhiza*, 8(4),  
580 175-180.
- 581  
582 Chen, Y.-L., Xu, T.-L., Veresoglou, S. D., Hu, H.-W., Hao, Z.-P., Hu, Y.-J., Liu, L., Deng, Y.,  
583 Rillig, M. C. and Chen, B.-D. (2017) 'Plant diversity represents the prevalent determinant  
584 of soil fungal community structure across temperate grasslands in northern China', *Soil*  
585 *Biology and Biochemistry*, 110, 12-21.
- 586  
587 Clark, R. B. (1997) 'Arbuscular mycorrhizal adaptation, spore germination, root colonization,  
588 and host plant growth and mineral acquisition at low pH', *Plant and Soil*, 192(1), 15-22.
- 589

- 590 Cole, L., Buckland, S. M. and Bardgett, R. D. (2005) 'Relating microarthropod community  
591 structure and diversity to soil fertility manipulations in temperate grassland', *Soil Biology  
592 and Biochemistry*, 37(9), 1707-1717.
- 593  
594 Connell, J. H. (1978) 'Diversity in tropical rain forests and coral reefs', *Science*, 199(4335),  
595 1302-1310.
- 596  
597 Cornell, H. V. and Harrison, S. P. (2014) 'What are species pools and when are they important?',  
598 *Annual Review of Ecology, Evolution, and Systematics*, 45(1), 45-67.
- 599  
600 Crowther, T. W., Stanton, D. W., Thomas, S. M., A'Bear, A. D., Hiscox, J., Jones, T. H.,  
601 Voříšková, J., Baldrian, P. and Boddy, L. (2013) 'Top-down control of soil fungal  
602 community composition by a globally distributed keystone consumer', *Ecology*, 94(11),  
603 2518-2528.
- 604  
605 de Bello, F., Price, J. N., Münkemüller, T., Liira, J., Zobel, M., Thuiller, W., Gerhold, P.,  
606 Götzenberger, L., Lavergne, S. and Lepš, J. (2012) 'Functional species pool framework to  
607 test for biotic effects on community assembly', *Ecology*, 93(10), 2263-2273.
- 608  
609 DeAngelis, D. L. (2012) *Dynamics of nutrient cycling and food webs*, Springer Science &  
610 Business Media.
- 611  
612 Dickie, I. A. (2007) 'Host preference, niches and fungal diversity', *The New Phytologist*, 174(2),  
613 230-233.
- 614  
615 Doneus, M. (2013) 'Openness as visualization technique for interpretative mapping of airborne  
616 lidar derived digital terrain models', *Remote Sensing*, 5(12), 6427-6442.
- 617  
618 Dove, N. C. and Keeton, W. S. (2015) 'Structural Complexity Enhancement increases fungal  
619 species richness in northern hardwood forests', *Fungal Ecology*, 13, 181-192.
- 620  
621 Dybzinski, R., Fargione, J. E., Zak, D. R., Fornara, D. and Tilman, D. (2008) 'Soil fertility  
622 increases with plant species diversity in a long-term biodiversity experiment', *Oecologia*,  
623 158(1), 85-93.
- 624  
625 Ejrnæs, R., Frøslev, T. G., Høye, T. T., Kjøller, R., Oddershede, A., Brunbjerg, A. K., Hansen,  
626 A. J. and Bruun, H. H. (2018) 'Uniquity: A general metric for biotic uniqueness of sites',  
627 *Biological Conservation*, 225, 98-105.
- 628

- 629 Epp Schmidt, D. J., Pouyat, R., Szlavecz, K., Setälä, H., Kotze, D. J., Yesilonis, I., Cilliers, S.,  
630 Hornung, E., Dombos, M. and Yarwood, S. A. (2017) 'Urbanization erodes  
631 ectomycorrhizal fungal diversity and may cause microbial communities to converge',  
632 *Nature ecology & evolution*, 1, 0123.
- 633
- 634 Fernández-Toirán, L. M., Ágreda, T. and Olano, J. M. (2006) 'Stand age and sampling year  
635 effect on the fungal fruit body community in Pinus pinaster forests in central Spain',  
636 *Canadian Journal of Botany*, 84(8), 1249-1258.
- 637
- 638 Fløjgaard, C., Valdez, J. W., Dalby, L., Moeslund, J. E., Clausen, K. K., Ejrnæs, R., Pärtel, M.  
639 and Brunbjerg, A. K. (2020) 'Dark diversity reveals importance of biotic resources and  
640 competition for plant diversity across broad environmental gradients', *Ecology and  
641 Evolution*, 00, 1– 11.
- 642
- 643 Fraser, L. H., Pither, J., Jentsch, A., Sternberg, M., Zobel, M., Askarizadeh, D., Bartha, S.,  
644 Beierkuhnlein, C., Bennett, J. A. and Bittel, A. (2015) 'Worldwide evidence of a  
645 unimodal relationship between productivity and plant species richness', *Science*,  
646 349(6245), 302-305.
- 647
- 648 Frøslev, T. G., Kjøller, R., Bruun, H. H., Ejrnæs, R., Hansen, A. J., Læssøe, T. and Heilmann-  
649 Clausen, J. (2019) 'Man against machine: Do fungal fruitbodies and eDNA give similar  
650 biodiversity assessments across broad environmental gradients?', *Biological  
651 Conservation*, 233, 201-212.
- 652
- 653 Geml, J., Gravendeel, B., van der Gaag, K. J., Neilen, M., Lammers, Y., Raes, N., Semenova, T.  
654 A., de Knijff, P. and Noordeloos, M. E. (2014) 'The Contribution of DNA Metabarcoding  
655 to Fungal Conservation: Diversity Assessment, Habitat Partitioning and Mapping Red-  
656 Listed Fungi in Protected Coastal Salix repens Communities in the Netherlands', *PLOS  
657 ONE*, 9(6), e99852.
- 658
- 659 Gijbels, P., Adriaens, D. and Honnay, O. (2012) 'An orchid colonization credit in restored  
660 calcareous grasslands', *Écoscience*, 19(1), 21-28.
- 661
- 662 Gómez-Hernández, M. and Williams-Linera, G. (2011) 'Diversity of macromycetes determined  
663 by tree species, vegetation structure, and microenvironment in tropical cloud forests in  
664 Veracruz, Mexico', *Botany*, 89(3), 203-216.
- 665
- 666 Gómez, F. J. R., Navarro-Cerrillo, R. M., Pérez-de-Luque, A., Oßwald, W., Vannini, A. and  
667 Morales-Rodríguez, C. (2019) 'Assessment of functional and structural changes of soil  
668 fungal and oomycete communities in holm oak declined dehesas through metabarcoding  
669 analysis', *Scientific reports*, 9(1), 5315.



- 670  
671 Graham, J. H., Leonard, R. T. and Menge, J. A. (1982) 'Interaction of light intensity and soil  
672 temperature with phosphorus inhibition of vesicular-arbuscular mycorrhiza formation',  
673 *New Phytologist*, 91(4), 683-690.
- 674  
675 Gupta, M. M., Gupta, A. and Kumar, P. (2018) 'Urbanization and biodiversity of arbuscular  
676 mycorrhizal fungi: The case study of Delhi, India', *Revista de Biología Tropical*, 66(4),  
677 1547-1558.
- 678  
679 Heilmann-Clausen, J., Frøslev, T. G., Læssøe, T. and Petersen, J. H. (2019) *Danmarks*  
680 *svampeatlas 2009-2013*, Svampetryk.
- 681  
682 Höfle, B., Hollaus, M. and Hagenauer, J. (2012) 'Urban vegetation detection using  
683 radiometrically calibrated small-footprint full-waveform airborne LiDAR data', *ISPRS*  
684 *Journal of photogrammetry and remote sensing*, 67, 134-147.
- 685  
686 Höfle, B. and Pfeifer, N. (2007) 'Correction of laser scanning intensity data: Data and model-  
687 driven approaches', *ISPRS Journal of photogrammetry and remote sensing*, 62(6), 415-  
688 433.
- 689  
690 Hubbell, S. P. (2011) *The unified neutral theory of biodiversity and biogeography (MPB-32)*,  
691 Princeton, New Jersey, USA: Princeton University Press.
- 692  
693 Hui, N., Liu, X., Kotze, D. J., Jumpponen, A., Francini, G. and Setälä, H. (2017)  
694 'Ectomycorrhizal Fungal Communities in Urban Parks Are Similar to Those in Natural  
695 Forests but Shaped by Vegetation and Park Age', *Applied and Environmental*  
696 *Microbiology*, 83(23), e01797-17.
- 697  
698 Hülber, K., Moser, D., Sauberer, N., Maas, B., Staudinger, M., Grass, V., Wrbka, T. and Willner,  
699 W. (2017) 'Plant species richness decreased in semi-natural grasslands in the Biosphere  
700 Reserve Wienerwald, Austria, over the past two decades, despite agri-environmental  
701 measures', *Agriculture, ecosystems & environment*, 243, 10-18.
- 702  
703 Humphrey, J. W., Newton, A. C., Peace, A. J. and Holden, E. (2000) 'The importance of conifer  
704 plantations in northern Britain as a habitat for native fungi', *Biological Conservation*,  
705 96(2), 241-252.
- 706  
707 Jacobson, K. M. (1997) 'Moisture and substrate stability determine VA-mycorrhizal fungal  
708 community distribution and structure in an arid grassland', *Journal of Arid Environments*,  
709 35(1), 59-75.
- 710



- 711 Junttila, S., Sugano, J., Vastaranta, M., Linnakoski, R., Kaartinen, H., Kukko, A., Holopainen,  
712 M., Hyyppä, H. and Hyyppä, J. (2018) 'Can leaf water content be estimated using  
713 multispectral terrestrial laser scanning? A case study with Norway spruce seedlings',  
714 *Frontiers in plant science*, 9, 299.
- 715  
716 Kalliokoski, T., Pennanen, T., Nygren, P., Sievänen, R. and Helmisaari, H.-S. (2010)  
717 'Belowground interspecific competition in mixed boreal forests: fine root and  
718 ectomycorrhiza characteristics along stand developmental stage and soil fertility  
719 gradients', *Plant and Soil*, 330(1-2), 73-89.
- 720  
721 Kennedy, P. G. and Peay, K. G. (2007) 'Different soil moisture conditions change the outcome of  
722 the ectomycorrhizal symbiosis between *Rhizopogon* species and *Pinus muricata*', *Plant*  
723 *and Soil*, 291(1), 155.
- 724  
725 Kivlin, S. N., Hawkes, C. V. and Treseder, K. K. (2011) 'Global diversity and distribution of  
726 arbuscular mycorrhizal fungi', *Soil Biology and Biochemistry*, 43(11), 2294-2303.
- 727  
728 Kuiters, A. T. (2013) 'Diversity–stability relationships in plant communities of contrasting  
729 habitats', *Journal of Vegetation Science*, 24(3), 453-462.
- 730  
731 Kutner, M. H., Nachtsheim, C. J., Neter, J. and Li, W. (2005) *Applied linear statistical models*,  
732 McGraw-Hill Irwin Boston.
- 733  
734 Lefsky, M. A., Cohen, W. B., Parker, G. G. and Harding, D. J. (2002) 'Lidar Remote Sensing for  
735 Ecosystem Studies: Lidar, an emerging remote sensing technology that directly measures  
736 the three-dimensional distribution of plant canopies, can accurately estimate vegetation  
737 structural attributes and should be of particular interest to forest, landscape, and global  
738 ecologists', *BioScience*, 52(1), 19-30.
- 739  
740 Leigh, J., Fitter, A. H. and Hodge, A. (2011) 'Growth and symbiotic effectiveness of an  
741 arbuscular mycorrhizal fungus in organic matter in competition with soil bacteria', *FEMS*  
742 *Microbiology Ecology*, 76(3), 428-438.
- 743  
744 Lewis, R. J., Bello, F., Bennett, J. A., Fibich, P., Finerty, G. E., Götzenberger, L., Hiiesalu, I.,  
745 Kasari, L., Lepš, J., Májerková, M., Mudrák, O., Riibak, K., Ronk, A., Rychtecká, T.,  
746 Vitová, A. and Pärtel, M. (2017) 'Applying the dark diversity concept to nature  
747 conservation', *Conservation Biology*, 31(1), 40-47.
- 748  
749 Lewis, R. J., Szava-Kovats, R., Pärtel, M. and Evolution (2016) 'Estimating dark diversity and  
750 species pools: an empirical assessment of two methods', *Methods in Ecology*, 7(1), 104-  
751 113.

- 752  
753 Liu, Y., Johnson, N. C., Mao, L., Shi, G., Jiang, S., Ma, X., Du, G., An, L. and Feng, H. (2015)  
754 'Phylogenetic structure of arbuscular mycorrhizal community shifts in response to  
755 increasing soil fertility', *Soil Biology and Biochemistry*, 89, 196-205.
- 756  
757 Lopatin, J., Dolos, K., Hernández, H., Galleguillos, M. and Fassnacht, F. (2016) 'Comparing  
758 generalized linear models and random forest to model vascular plant species richness  
759 using LiDAR data in a natural forest in central Chile', *Remote Sensing of Environment*,  
760 173, 200-210.
- 761  
762 Luo, S., De Deyn, G. B., Jiang, B. and Yu, S. (2017) 'Soil biota suppress positive plant diversity  
763 effects on productivity at high but not low soil fertility', *Journal of Ecology*, 105(6),  
764 1766-1774.
- 765  
766 Mao, L., Dennett, J., Bater, C. W., Tompalski, P., Coops, N. C., Farr, D., Kohler, M., White, B.,  
767 Stadt, J. J. and Nielsen, S. E. (2018) 'Using airborne laser scanning to predict plant  
768 species richness and assess conservation threats in the oil sands region of Alberta's boreal  
769 forest', *Forest Ecology and Management*, 409, 29-37.
- 770  
771 Mateo, R. G., Mokany, K. and Guisan, A. (2017) 'Biodiversity Models: What If Unsaturation Is  
772 the Rule?', *Trends in Ecology & Evolution*, 32(8), 556-566.
- 773  
774 McCune, B. (1994) 'Improving community analysis with the Beals smoothing function',  
775 *Écoscience*, 1(1), 82-86.
- 776  
777 McCune, B. and Keon, D. (2002) 'Equations for potential annual direct incident radiation and  
778 heat load', *Journal of Vegetation Science*, 13(4), 603-606.
- 779  
780 Milberg, P., Bergstedt, J., Fridman, J., Odell, G. and Westerberg, L. (2008) 'Observer bias and  
781 random variation in vegetation monitoring data', *Journal of Vegetation Science*, 19(5),  
782 633-644.
- 783  
784 Moeslund, J., Arge, L. and Bøcher, P. (2013) 'Topographically controlled soil moisture is the  
785 primary driver of local vegetation patterns across a lowland region', *Ecosphere*, 4(7), 1-  
786 26.
- 787  
788 Moeslund, J. E., Brunbjerg, A. K., Clausen, K. K., Dalby, L., Fløjgaard, C., Juel, A. and Lenoir,  
789 J. (2017) 'Using dark diversity and plant characteristics to guide conservation and  
790 restoration', *Journal of Applied Ecology*, 54(6), 1730-1741.
- 791

- 792 Moeslund, J. E., Zlinszky, A., Ejrnæs, R., Brunbjerg, A. K., Bøcher, P. K., Svenning, J.-C. and  
793 Normand, S. (2019) 'Light detection and ranging explains diversity of plants, fungi,  
794 lichens, and bryophytes across multiple habitats and large geographic extent', *Ecological*  
795 *Applications*, 29(5), e01907.
- 796  
797 Mokany, A. and Shine, R. (2003) 'Competition between tadpoles and mosquito larvae',  
798 *Oecologia*, 135(4), 615-620.
- 799  
800 Mueller, G. M. (2011) *Biodiversity of fungi: inventory and monitoring methods*, Elsevier.
- 801  
802 Münzbergová, Z. and Herben, T. (2004) 'Identification of suitable unoccupied habitats in  
803 metapopulation studies using co-occurrence of species', *Oikos*, 105(2), 408-414.
- 804  
805 Nadeau, M. B. and Sullivan, T. P. (2015) 'Relationships between plant biodiversity and soil  
806 fertility in a mature tropical forest, Costa Rica', *International Journal of Forestry*  
807 *Research*, 2015, 1-13.
- 808  
809 Nguyen, N. H., Song, Z., Bates, S. T., Branco, S., Tedersoo, L., Menke, J., Schilling, J. S. and  
810 Kennedy, P. G. (2016) 'FUNGuild: an open annotation tool for parsing fungal community  
811 datasets by ecological guild', *Fungal Ecology*, 20, 241-248.
- 812  
813 Nordén, B. and Paltto, H. (2001) 'Wood-decay fungi in hazel wood: species richness correlated  
814 to stand age and dead wood features', *Biological Conservation*, 101(1), 1-8.
- 815  
816 Nordén, B., Ryberg, M., Götmark, F. and Olausson, B. (2004) 'Relative importance of coarse and  
817 fine woody debris for the diversity of wood-inhabiting fungi in temperate broadleaf  
818 forests', *Biological Conservation*, 117(1), 1-10.
- 819  
820 Noreika, N., Pärtel, M. and Öckinger, E. (2020) 'Community completeness as a measure of  
821 restoration success: multiple-study comparisons across ecosystems and ecological  
822 groups', *Biodiversity and Conservation*, 29(13), 3807-3827.
- 823  
824 Oksanen, J., Blanchet, F. G., Kindt, R., Legendre, P., Minchin, P. R., O'Hara, R., Simpson, G.  
825 L., Solymos, P., Stevens, M. and Wagner, H. (2017) 'vegan: Community Ecology  
826 Package. R package version 2.4-3'.
- 827  
828 Pärtel, M. (2014) 'Community ecology of absent species: hidden and dark diversity', *Journal of*  
829 *Vegetation Science*, 25(5), 1154-1159.
- 830

- 831 Pärtel, M., Öpik, M., Moora, M., Tedersoo, L., Szava-Kovats, R., Rosendahl, S., Rillig, M. C.,  
832 Lekberg, Y., Kreft, H., Helgason, T., Eriksson, O., Davison, J., Bello, F., Caruso, T. and  
833 Zobel, M. (2017a) 'Historical biome distribution and recent human disturbance shape the  
834 diversity of arbuscular mycorrhizal fungi', *New Phytologist*, 216(1), 227-238.
- 835  
836 Pärtel, M., Szava-Kovats, R. and Zobel, M. (2011) 'Dark diversity: shedding light on absent  
837 species', *Trends in Ecology & Evolution*, 26(3), 124-128.
- 838  
839 Pärtel, M., Szava-Kovats, R. and Zobel, M. (2013) 'Community completeness: linking local and  
840 dark diversity within the species pool concept', *Folia Geobotanica*, 48(3), 307-317.
- 841  
842 Pärtel, M., Zobel, M., Öpik, M. and Tedersoo, L. (2017b) 'Global patterns in local and dark  
843 diversity, species pool size and community completeness in ectomycorrhizal fungi' in  
844 Tedersoo, L., ed., *Biogeography of Mycorrhizal Symbiosis*, Cham, Switzerland: Springer  
845 International Publishing, 395-406.
- 846  
847 Pärtel, M., Zobel, M., Zobel, K. and van der Maarel, E. (1996) 'The species pool and its relation  
848 to species richness: Evidence from estonian plant communities', *Oikos*, 75(1), 111-117.
- 849  
850 Pellkofer, S., van der Heijden, M. G. A., Schmid, B. and Wagg, C. (2016) 'Soil Communities  
851 Promote Temporal Stability and Species Asynchrony in Experimental Grassland  
852 Communities', *PLOS ONE*, 11(2), e0148015.
- 853  
854 Penone, C., Allan, E., Soliveres, S., Felipe-Lucia, M. R., Gossner, M. M., Seibold, S., Simons,  
855 N. K., Schall, P., van der Plas, F., Manning, P., Manzanedo, R. D., Boch, S., Prati, D.,  
856 Ammer, C., Bauhus, J., Buscot, F., Ehbrecht, M., Goldmann, K., Jung, K., Müller, J.,  
857 Müller, J. C., Pena, R., Polle, A., Renner, S. C., Ruess, L., Schönig, I., Schrumpf, M.,  
858 Solly, E. F., Tschapka, M., Weisser, W. W., Wubet, T. and Fischer, M. (2019)  
859 'Specialisation and diversity of multiple trophic groups are promoted by different forest  
860 features', *Ecology letters*, 22(1), 170-180.
- 861  
862 Peura, M., Gonzalez, R. S., Müller, J., Heurich, M., Vierling, L. A., Mönkkönen, M. and Bässler,  
863 C. (2016) 'Mapping a 'cryptic kingdom': Performance of lidar derived environmental  
864 variables in modelling the occurrence of forest fungi', *Remote Sensing of Environment*,  
865 186, 428-438.
- 866  
867 Pfeifer, N., Mandlbürger, G., Otepka, J. and Karel, W. (2014) 'OPALS—A framework for  
868 Airborne Laser Scanning data analysis', *Computers, Environment and Urban Systems*, 45,  
869 125-136.
- 870  
871 R Core Team (2019) 'R: A language and environment for statistical computing ', 3.6.0

- 872  
873 Ricotta, C. (2005) 'Through the Jungle of Biological Diversity', *Acta Biotheoretica*, 53(1), 29-38.
- 874  
875 Ricotta, C. (2007) 'A semantic taxonomy for diversity measures', *Acta Biotheoretica*, 55(1), 23-  
876 33.
- 877  
878 Riibak, K., Ronk, A., Kattge, J. and Pärtel, M. (2017) 'Dispersal limitation determines  
879 large-scale dark diversity in Central and Northern Europe', *Journal of Biogeography*,  
880 44(8), 1770-1780.
- 881  
882 Ronk, A., Szava-Kovats, R. and Pärtel, M. (2015) 'Applying the dark diversity concept to plants  
883 at the European scale', *Ecography*, 38(10), 1015-1025.
- 884  
885 Rousk, J., Bååth, E., Brookes, P. C., Lauber, C. L., Lozupone, C., Caporaso, J. G., Knight, R. and  
886 Fierer, N. (2010) 'Soil bacterial and fungal communities across a pH gradient in an arable  
887 soil', *The ISME journal*, 4(10), 1340.
- 888  
889 Rousk, J., Brookes, P. C. and Bååth, E. (2009) 'Contrasting soil pH effects on fungal and  
890 bacterial growth suggest functional redundancy in carbon mineralization', *Applied and  
891 Environmental Microbiology*, 75(6), 1589-1596.
- 892  
893 Salusso, M. M. and Moraña, L. B. (1995) 'Estructura de la comunidad de hongos  
894 ectomicorrízicos en bosques de Pinus spp. de Altos La Sierra, Argentina', *Revista Chilena  
895 de Historia Natural*, 68, 509-513.
- 896  
897 Sarkar, S. and Margules, C. (2002) 'Operationalizing biodiversity for conservation planning',  
898 *Journal of Biosciences*, 27(4), 299-308.
- 899  
900 Scott, C. E., Alofs, K. M. and Edwards, B. A. (2011) 'Putting dark diversity in the spotlight',  
901 *Trends in Ecology & Evolution*, 26(6), 263-264.
- 902  
903 Silvertown, J., Araya, Y. and Gowing, D. (2015) 'Hydrological niches in terrestrial plant  
904 communities: a review', *Journal of Ecology*, 103(1), 93-108.
- 905  
906 Solow, A. R. and Polasky, S. (1994) 'Measuring biological diversity', *Environmental and  
907 Ecological Statistics*, 1(2), 95-103.
- 908  
909 Staddon, P. L., Thompson, K., Jakobsen, I., Grime, J. P., Askew, A. P. and Fitter, A. H. (2003)  
910 'Mycorrhizal fungal abundance is affected by long-term climatic manipulations in the  
911 field', *Global Change Biology*, 9(2), 186-194.

- 912  
913 Sterkenburg, E., Bahr, A., Brandström Durling, M., Clemmensen, K. E. and Lindahl, B. D.  
914 (2015) 'Changes in fungal communities along a boreal forest soil fertility gradient', *New*  
915 *Phytologist*, 207(4), 1145-1158.
- 916  
917 Su, J. G. and Bork, E. W. (2007) 'Characterization of diverse plant communities in Aspen  
918 Parkland rangeland using LiDAR data', *Applied Vegetation Science*, 10(3), 407-416.
- 919  
920 Tedersoo, L., Bahram, M., Põlme, S., Kõljalg, U., Yorou, N. S., Wijesundera, R., Ruiz, L. V.,  
921 Vasco-Palacios, A. M., Thu, P. Q., Suija, A., Smith, M. E., Sharp, C., Saluveer, E., Saitta,  
922 A., Rosas, M., Riit, T., Ratkowsky, D., Pritsch, K., Põldmaa, K., Piepenbring, M., Phosri,  
923 C., Peterson, M., Parts, K., Pärtel, K., Otsing, E., Nouhra, E., Njouonkou, A. L., Nilsson,  
924 R. H., Morgado, L. N., Mayor, J., May, T. W., Majuakim, L., Lodge, D. J., Lee, S. S.,  
925 Larsson, K.-H., Kohout, P., Hosaka, K., Hiiesalu, I., Henkel, T. W., Harend, H., Guo, L.-  
926 d., Greslebin, A., Grelet, G., Geml, J., Gates, G., Dunstan, W., Dunk, C., Drenkhan, R.,  
927 Dearnaley, J., De Kesel, A., Dang, T., Chen, X., Buegger, F., Brearley, F. Q., Bonito, G.,  
928 Anslan, S., Abell, S. and Abarenkov, K. (2014) 'Global diversity and geography of soil  
929 fungi', *Science*, 346(6213), 1256688.
- 930  
931 Thers, H., Brunbjerg, A. K., Læssøe, T., Ejrnæs, R., Bøcher, P. K. and Svenning, J.-C. (2017)  
932 'Lidar-derived variables as a proxy for fungal species richness and composition in  
933 temperate Northern Europe', *Remote Sensing of Environment*, 200, 102-113.
- 934  
935 Tonn, N. and Ibáñez, I. (2017) 'Plant-mycorrhizal fungi associations along an urbanization  
936 gradient: implications for tree seedling survival', *Urban Ecosystems*, 20(4), 823-837.
- 937  
938 Townsend, C. R., Scarsbrook, M. R. and Dolédec, S. (1997) 'The intermediate disturbance  
939 hypothesis, refugia, and biodiversity in streams', *Limnology and oceanography*, 42(5),  
940 938-949.
- 941  
942 Turner, G. D., Lewis, J. D., Mates-Muchin, J. T., Schuster, W. F. and Watt, L. (2009) 'Light  
943 availability and soil source influence ectomycorrhizal fungal communities on oak  
944 seedlings grown in oak- and hemlock-associated soils Contribution No. 225 of the Louis  
945 Calder Center and Biological Station, Fordham University, Armonk, New York',  
946 *Canadian Journal of Forest Research*, 39(7), 1247-1258.
- 947  
948 Twieg, B. D., Durall, D. M. and Simard, S. W. (2007) 'Ectomycorrhizal fungal succession in  
949 mixed temperate forests', *New Phytologist*, 176(2), 437-447.
- 950  
951 Unterseher, M. and Tal, O. (2006) 'Influence of small scale conditions on the diversity of wood  
952 decay fungi in a temperate, mixed deciduous forest canopy', *Mycological Research*,  
953 110(2), 169-178.



- 954  
955 Valdez, J. W., Hartig, F., Fennel, S. and Poschlod, P. (2019) 'The recruitment niche predicts  
956 plant community assembly across a hydrological gradient along plowed and undisturbed  
957 transects in a former agricultural wetland', *Frontiers in plant science*, 10, 88.
- 958  
959 Vehmas, M., Eerikäinen, K., Peuhkurinen, J., Packalén, P. and Maltamo, M. (2009)  
960 'Identification of boreal forest stands with high herbaceous plant diversity using airborne  
961 laser scanning', *Forest Ecology and Management*, 257(1), 46-53.
- 962  
963 Wang, J., Chen, C., Ye, Z., Li, J., Feng, Y. and Lu, Q. (2018) 'Relationships Between Fungal and  
964 Plant Communities Differ Between Desert and Grassland in a Typical Dryland Region of  
965 Northwest China', *Frontiers in Microbiology*, 9(2327).
- 966  
967 Xiong, S. J., Johansson, M. E., Hughes, F. M. R., Hayes, A., Richards, K. S. and Nilsson, C.  
968 (2003) 'Interactive effects of soil moisture, vegetation canopy, plant litter and seed  
969 addition on plant diversity in a wetland community', *Journal of Ecology*, 91(6), 976-986.
- 970  
971 Yahr, R., Schoch, C. L. and Dentinger, B. T. (2016) 'Scaling up discovery of hidden diversity in  
972 fungi: impacts of barcoding approaches', *Philosophical Transactions of the Royal Society  
973 B: Biological Sciences*, 371(1702), 20150336.
- 974  
975 Yang, G., Wagg, C., Veresoglou, S. D., Hempel, S. and Rillig, M. C. (2018) 'How Soil Biota  
976 Drive Ecosystem Stability', *Trends in Plant Science*, 23(12), 1057-1067.
- 977  
978 Yang, T., Adams, J. M., Shi, Y., He, J.-s., Jing, X., Chen, L., Tedersoo, L. and Chu, H. (2017)  
979 'Soil fungal diversity in natural grasslands of the Tibetan Plateau: associations with plant  
980 diversity and productivity', *New Phytologist*, 215(2), 756-765.
- 981  
982 Zak, D. R., Holmes, W. E., White, D. C., Peacock, A. D. and Tilman, D. (2003) 'Plant diversity,  
983 soil microbial communities, and ecosystem function: Are there any links?', *Ecology*,  
984 84(8), 2042-2050.
- 985  
986 Zlinszky, A., Schroiff, A., Kania, A., Deák, B., Mücke, W., Vári, Á., Székely, B. and Pfeifer, N.  
987 (2014) 'Categorizing grassland vegetation with full-waveform airborne laser scanning: A  
988 feasibility study for detecting Natura 2000 habitat types', *Remote Sensing*, 6(9), 8056-  
989 8087.
- 990  
991 Zobel, M. (2016) 'The species pool concept as a framework for studying patterns of plant  
992 diversity', *Journal of Vegetation Science*, 27(1), 8-18.
- 993



994 Zuo, X., Wang, S., Lv, P., Zhou, X., Zhao, X., Zhang, T. and Zhang, J. (2016) 'Plant functional  
995 diversity enhances associations of soil fungal diversity with vegetation and soil in the  
996 restoration of semiarid sandy grassland', *Ecology and Evolution*, 6(1), 318-328.

997

998
